# Supplementary material
Source: PubMed Central journal article supplement (PMC3008555)

Supplementals

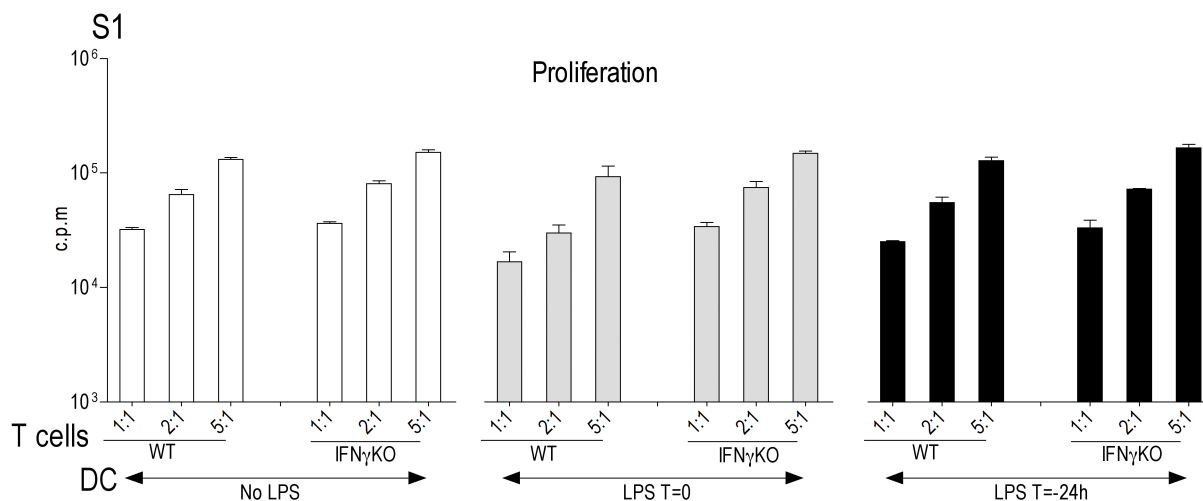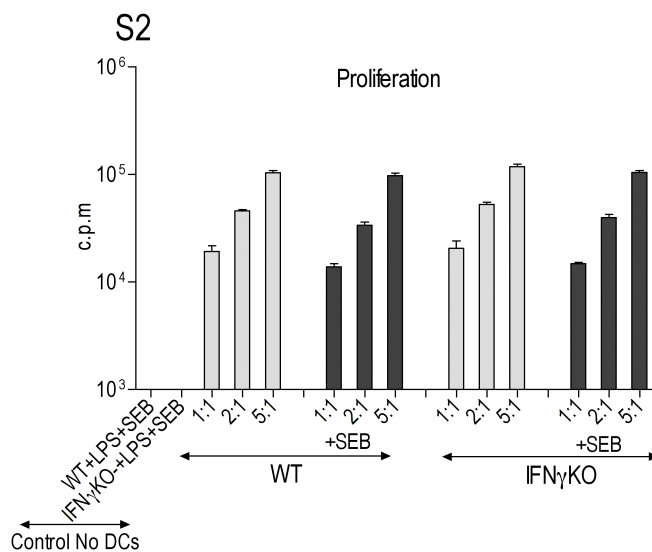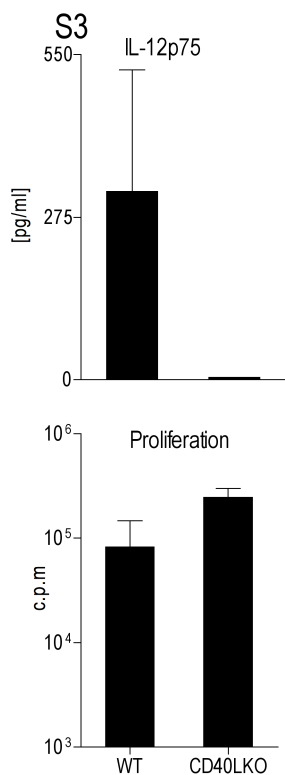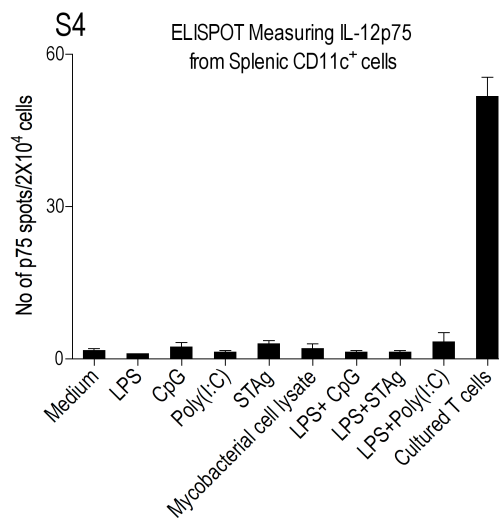

Supplement: NIHMS235252-supplement-sf_1-4.pdf [file NIHMS235252-supplement-sf_1-4.pdf]

S5

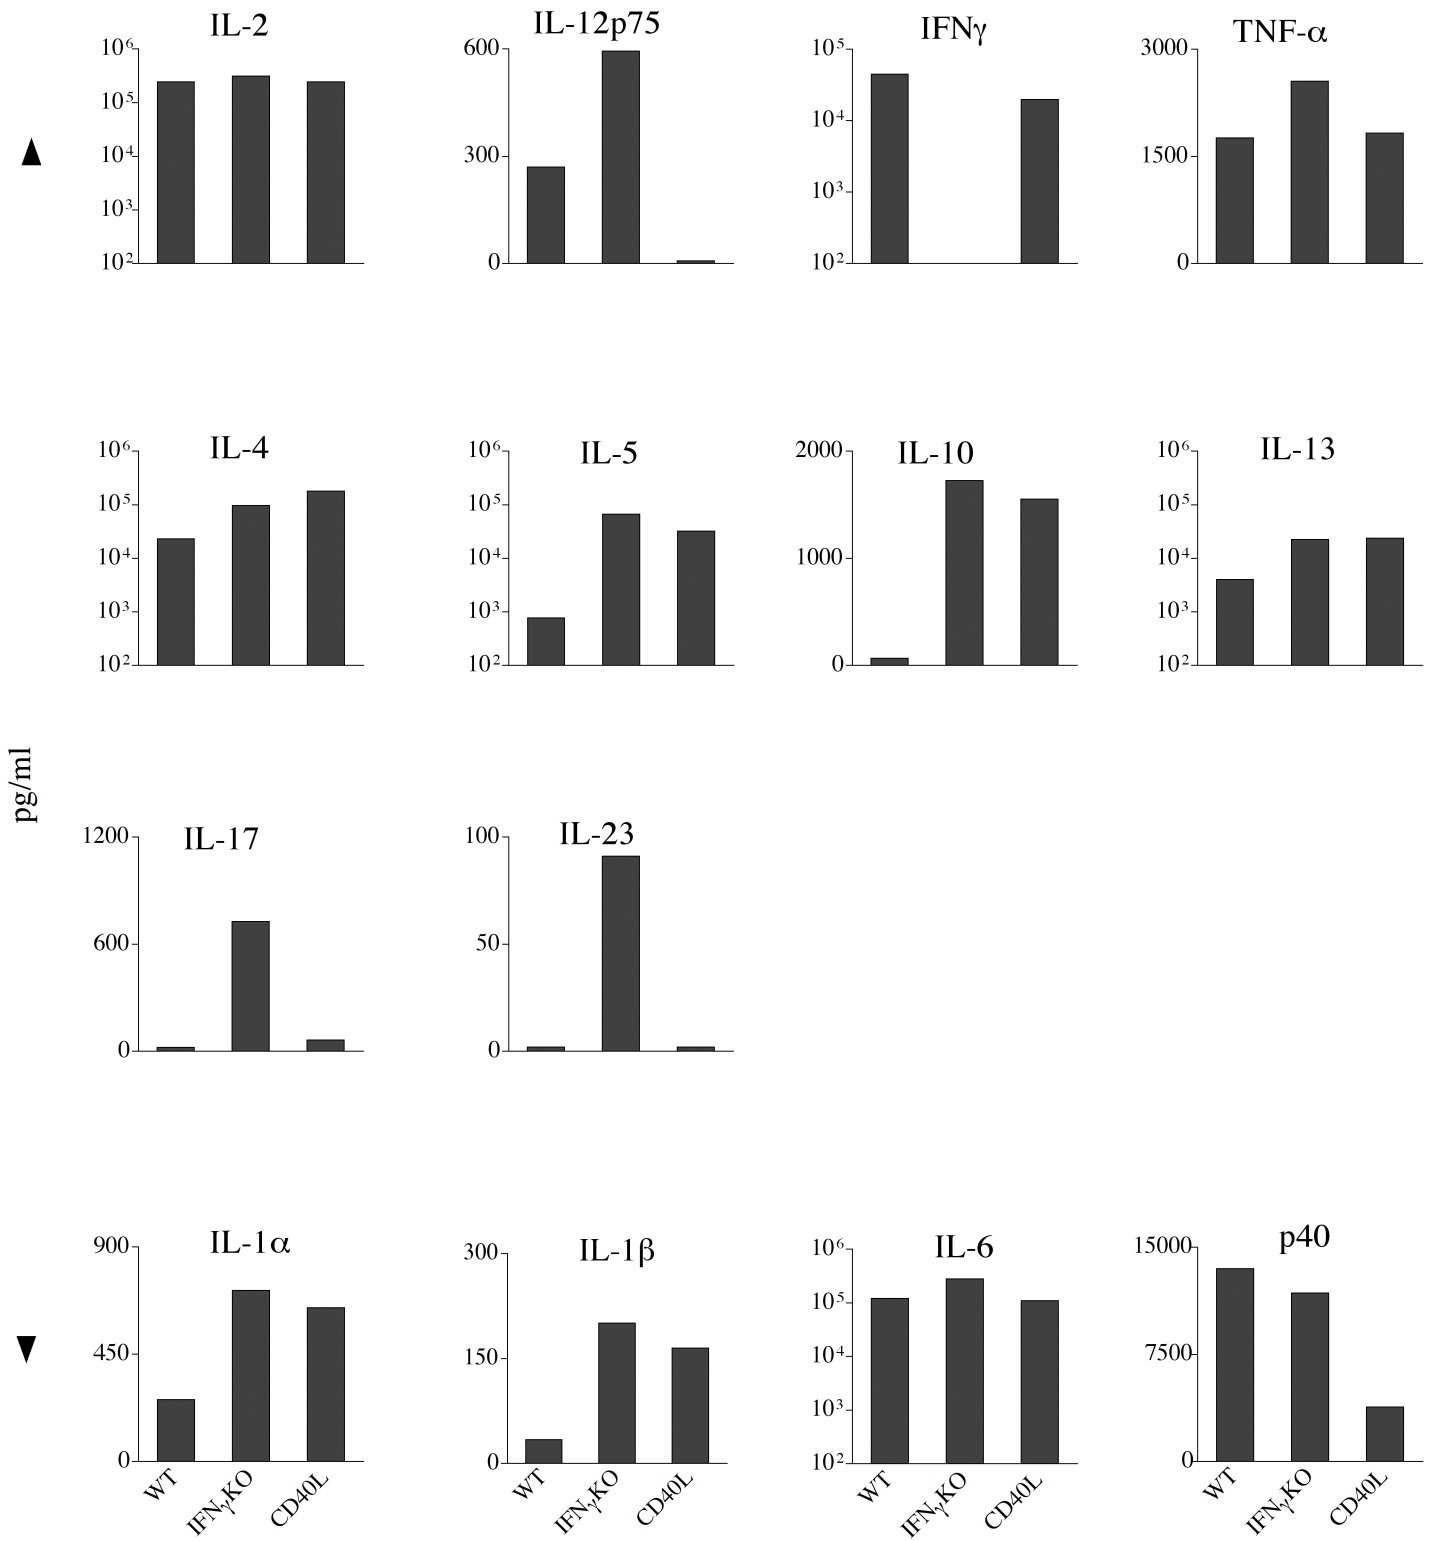

Supplement: NIHMS235252-supplement-sf_5.pdf [file NIHMS235252-supplement-sf_5.pdf]
